# Supplementary material
Source: PubMed Central journal article supplement (PMC4850906)

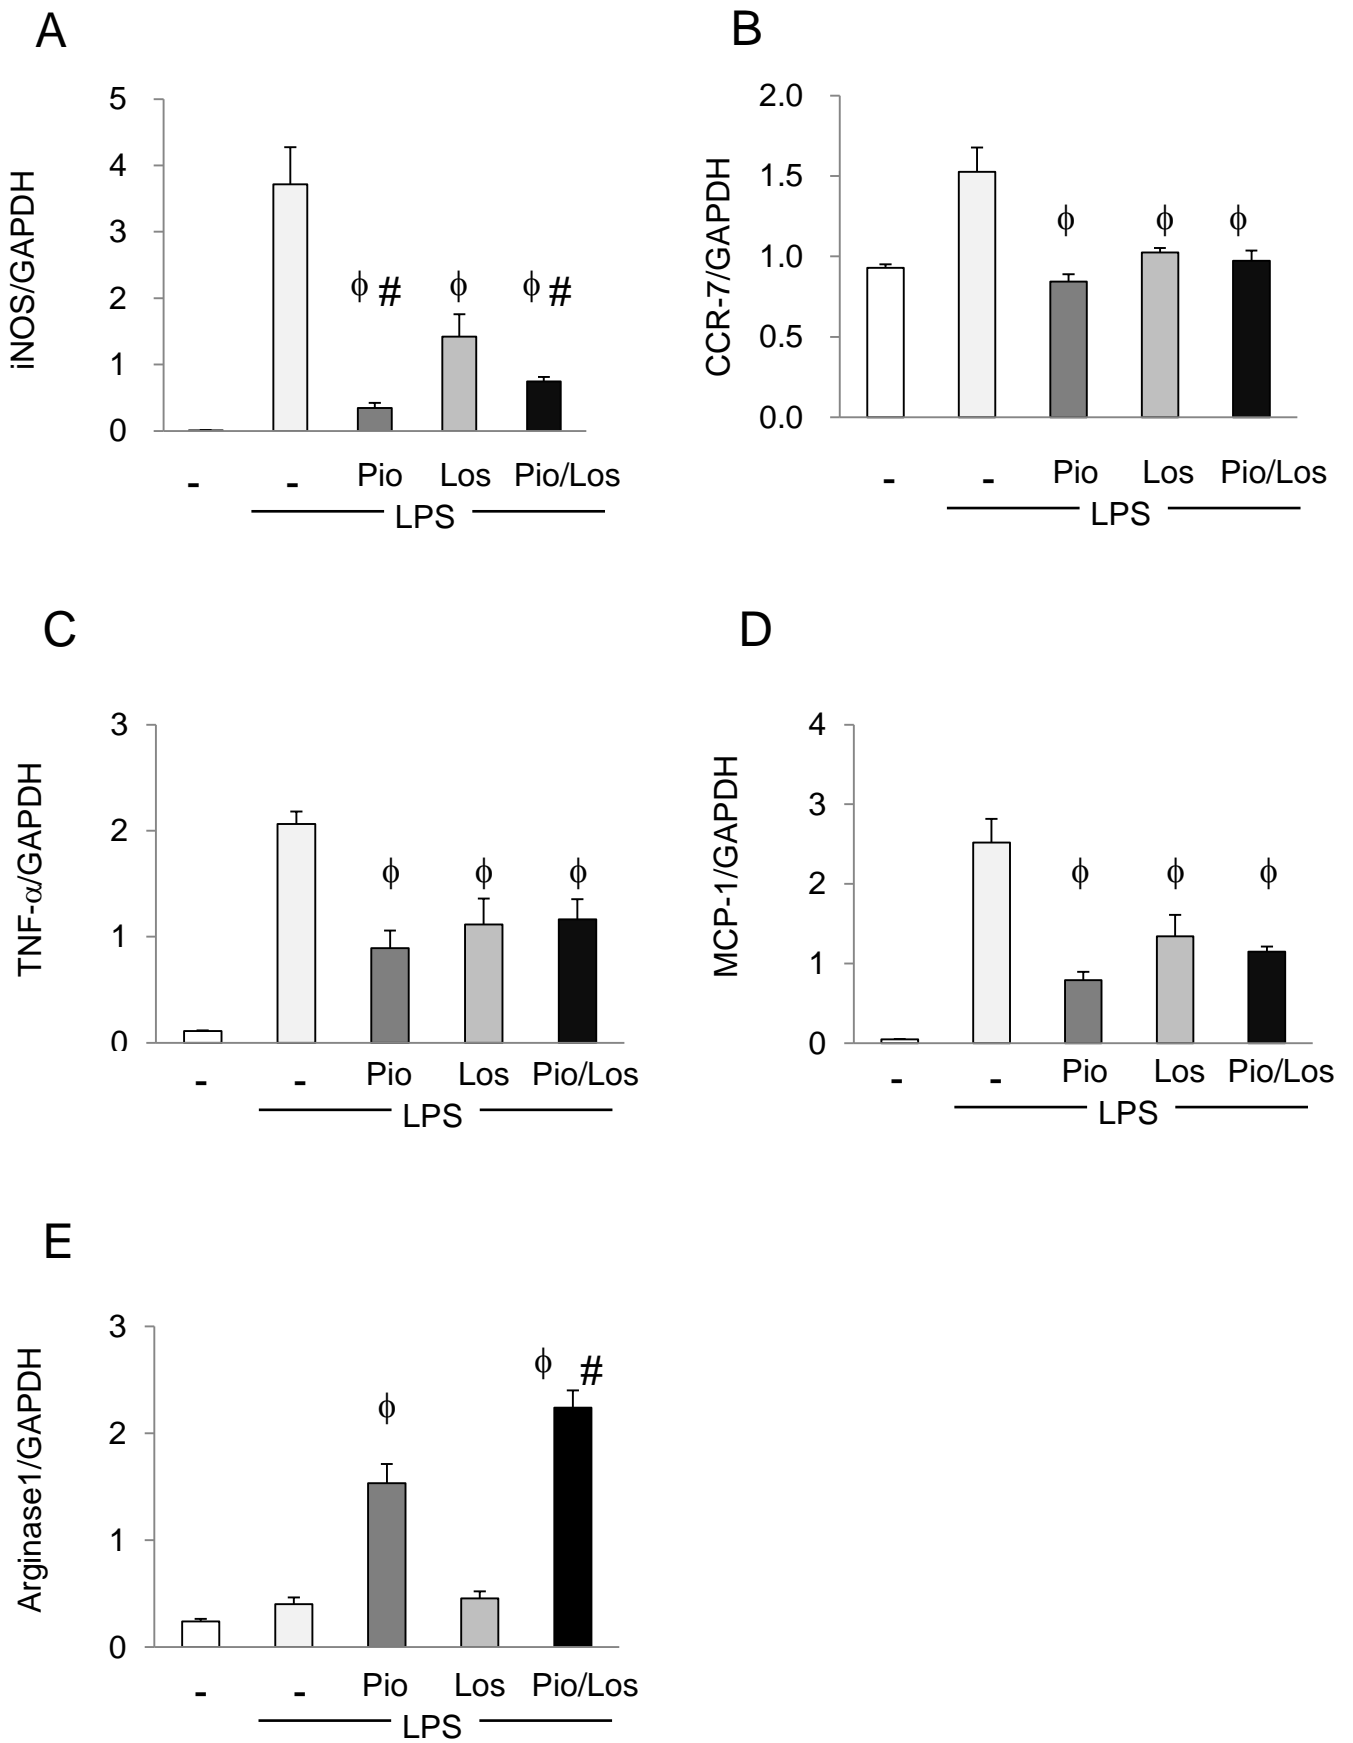

Supplement: NIHMS766593-supplement-supplement_1.pdf [file NIHMS766593-supplement-supplement_1.pdf]
